# Supplementary material for: Accelerated 3D whole-heart non-contrast-enhanced mDIXON coronary MR angiography using deep learning-constrained compressed sensing reconstruction
Source: PubMed Central journal article supplement (PMC11413263; doi:10.1186/s13244-024-01797-3), 2024-09-19
Supplement: 13244_2024_1797_MOESM1_ESM.pdf [file 13244_2024_1797_MOESM1_ESM.pdf]

**Accelerated 3D whole-heart non-contrast-enhanced mDIXON  
coronary MR angiography using deep learning-constrained  
compressed sensing reconstruction**

**ELECTRONIC SUPPLEMENTARY MATERIAL**

**Supplementary Table 1.** Subjective image quality (distribution) comparison among the three sequences.

| Quality score | DL-CS     |        |        |        | CS        |        |        |        | Conventional |        |        |        |
|---------------|-----------|--------|--------|--------|-----------|--------|--------|--------|--------------|--------|--------|--------|
|               | Reader    | Reader | Reader | Reader | Reader    | Reader | Reader | Reader | Reader       | Reader | Reader | Reader |
|               | 1         | 2      | 3      | 4      | 1         | 2      | 3      | 4      | 1            | 2      | 3      | 4      |
| 1             | 0         | 0      | 0      | 0      | 0         | 0      | 0      | 0      | 0            | 0      | 0      | 0      |
| 2             | 2         | 2      | 2      | 1      | 6         | 7      | 5      | 5      | 7            | 7      | 6      | 7      |
| 3             | 6         | 5      | 5      | 7      | 13        | 12     | 14     | 14     | 13           | 12     | 13     | 11     |
| 4             | 9         | 12     | 12     | 10     | 6         | 7      | 6      | 7      | 5            | 7      | 7      | 9      |
| 5             | 13        | 11     | 11     | 12     | 5         | 4      | 5      | 4      | 5            | 4      | 4      | 3      |
| Kappa value   | 0.75-0.93 |        |        |        | 0.80-0.97 |        |        |        | 0.77-0.90    |        |        |        |
